# Supplementary material for: MagT1 regulated the odontogenic differentiation of BMMSCs induced byTGC-CM via ERK signaling pathway
Source: PubMed Central journal article supplement (PMC6357492; doi:10.1186/s13287-019-1148-6), 2019-01-31
Supplement: 13287_2019_1148_MOESM1_ESM.pdf [file 13287_2019_1148_MOESM1_ESM.pdf]

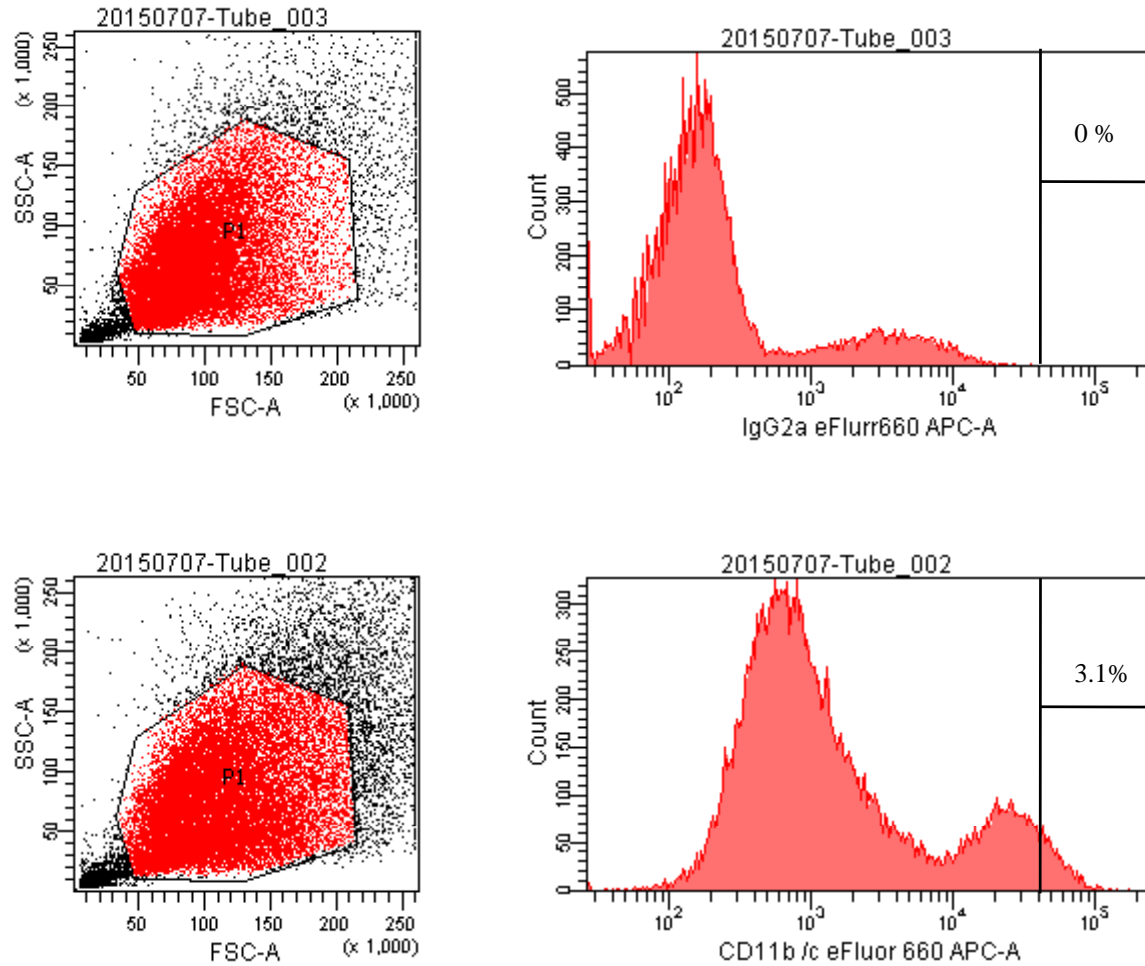

Figure S1 the expression rate of CD11b/c was only 3.1%, when compared to negative control group staining by isotype control antibodies
