# Supplementary material for: MagT1 regulated the odontogenic differentiation of BMMSCs induced byTGC-CM via ERK signaling pathway
Source: PubMed Central journal article supplement (PMC6357492; doi:10.1186/s13287-019-1148-6), 2019-01-31
Supplement: 13287_2019_1148_MOESM3_ESM.pdf [file 13287_2019_1148_MOESM3_ESM.pdf]

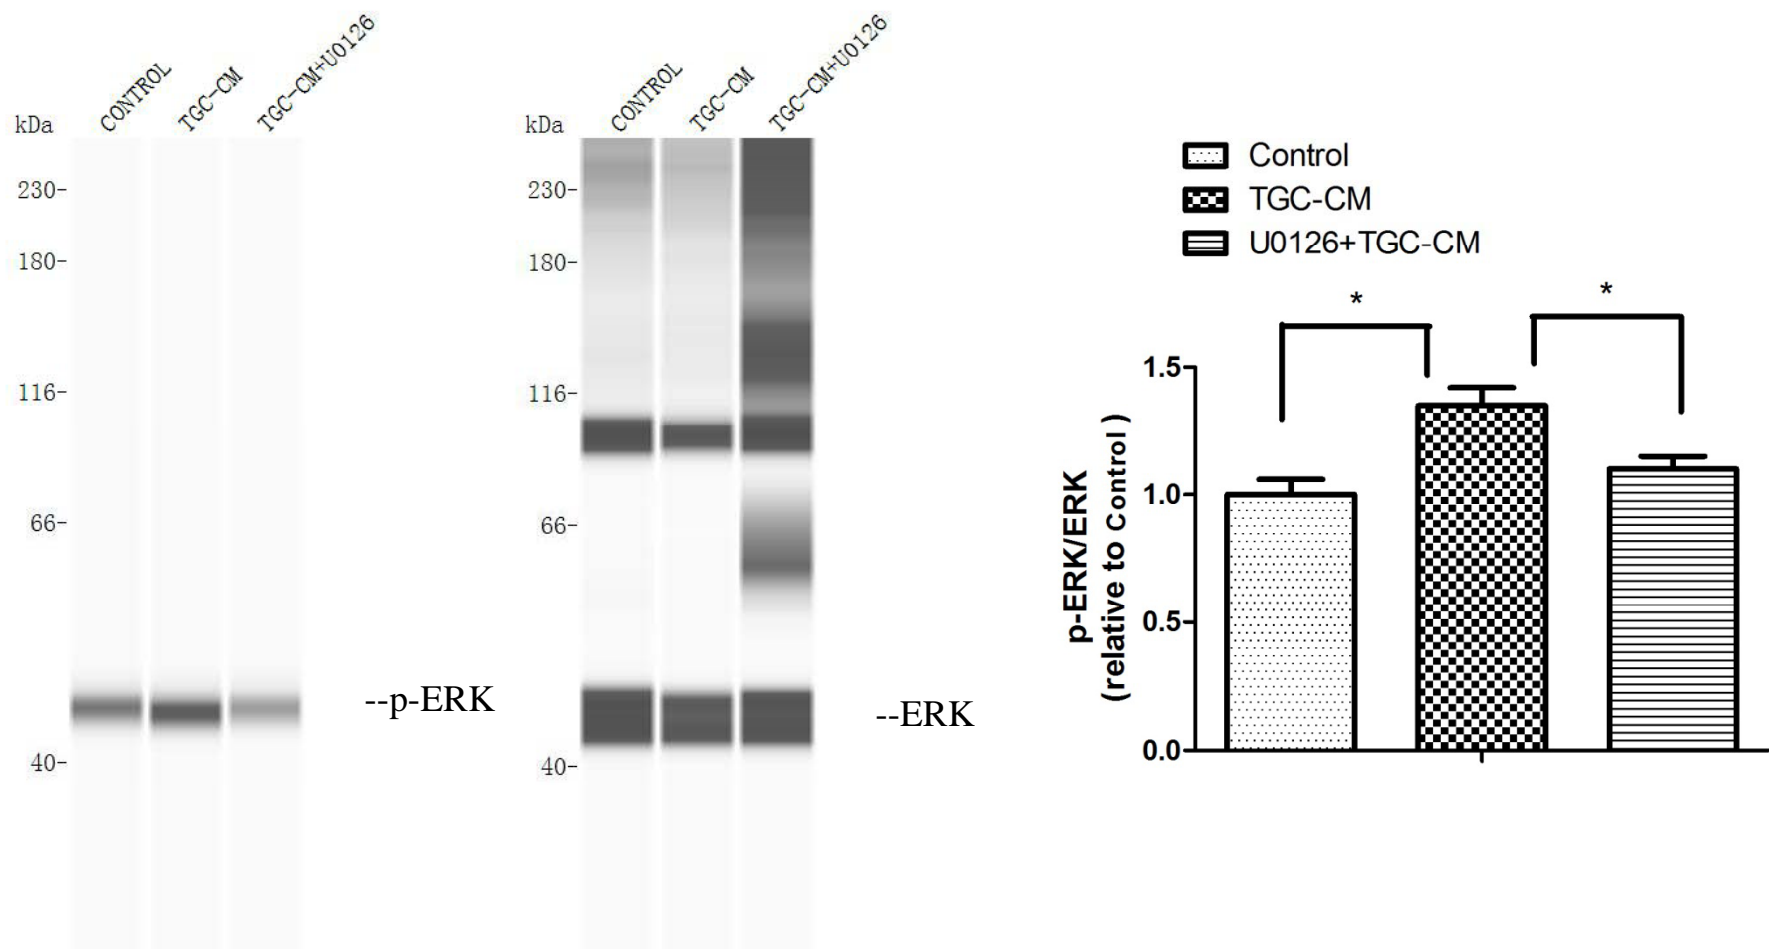

Figure S3. The effect of U0126 in p-ERK/ERK during TGC-CM mediated odontogenic differentiation of BMMSCs for 7 days. U0126 significantly reduced the phosphorylated level of ERK.
