# Supplementary material for: MagT1 regulated the odontogenic differentiation of BMMSCs induced byTGC-CM via ERK signaling pathway
Source: PubMed Central journal article supplement (PMC6357492; doi:10.1186/s13287-019-1148-6), 2019-01-31
Supplement: 13287_2019_1148_MOESM5_ESM.pdf [file 13287_2019_1148_MOESM5_ESM.pdf]

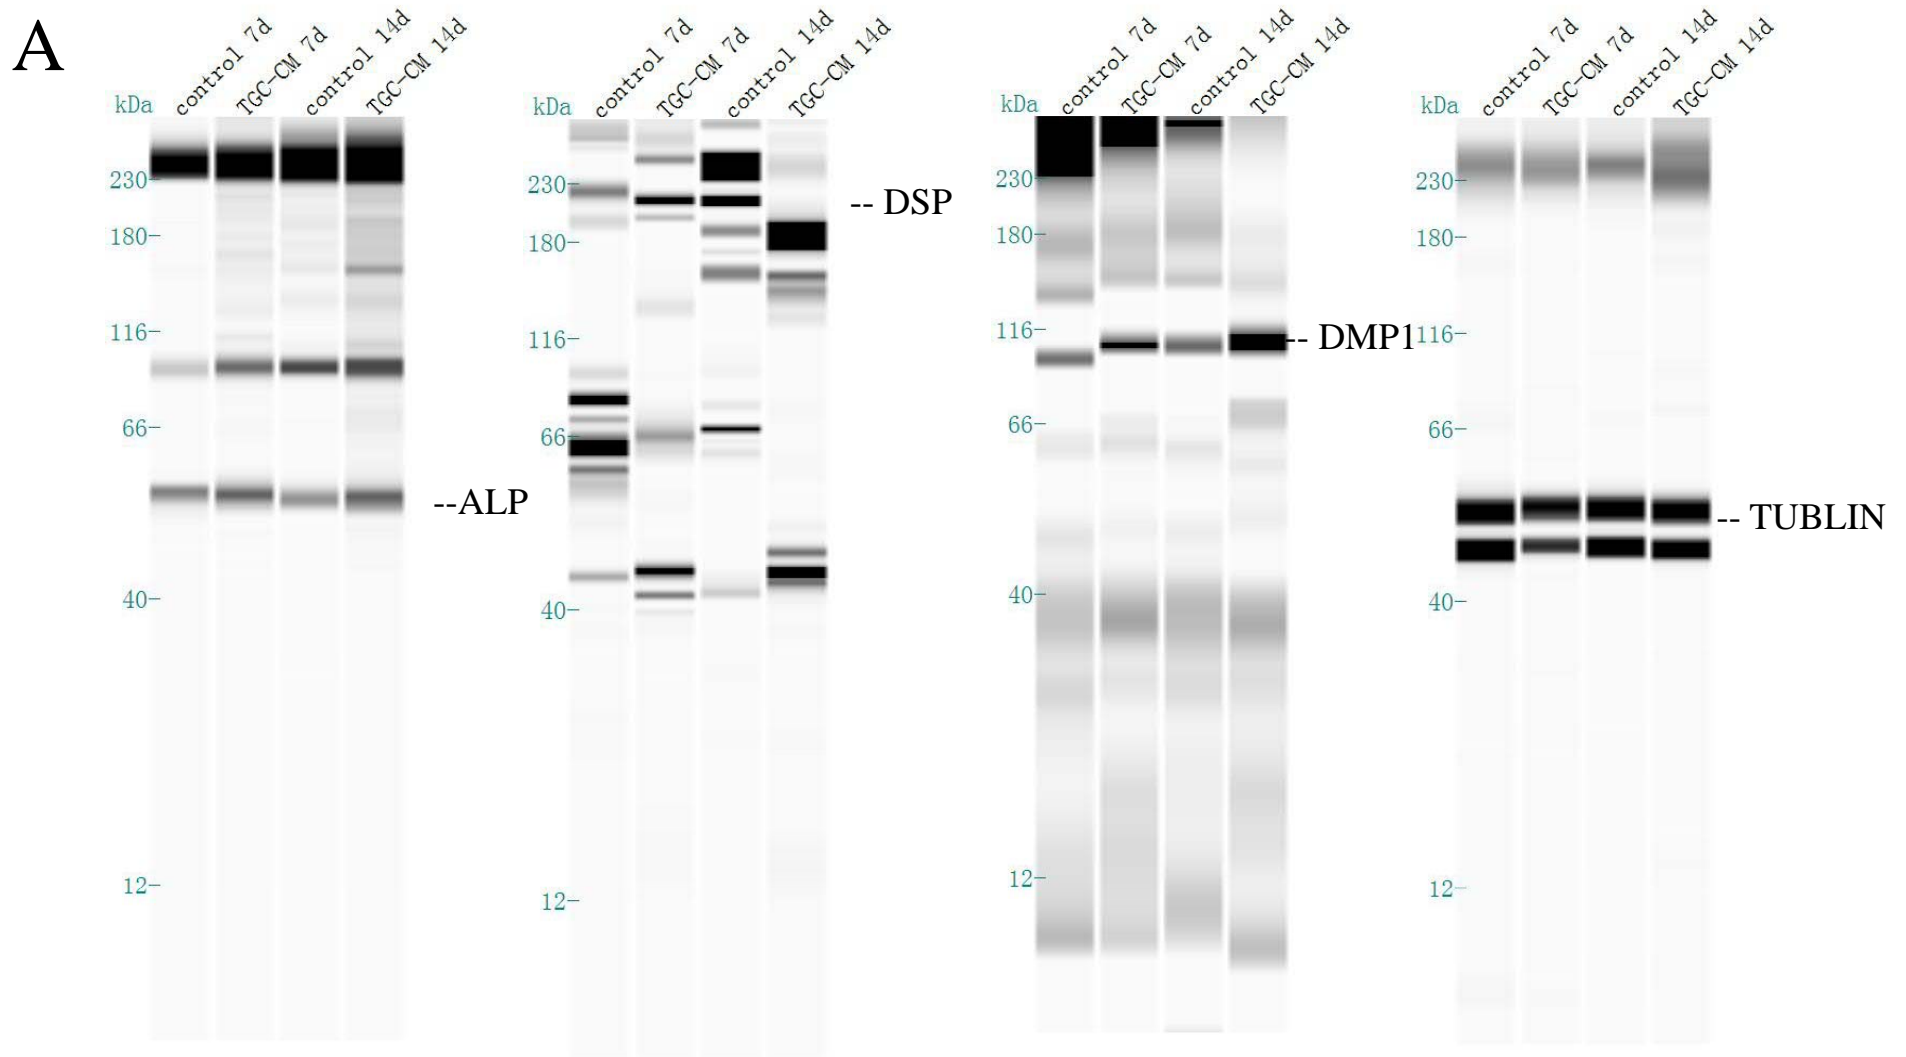

Figure S2 A. original non-edited western blotting bands performed by Protein Simple Western of Figure 1J in this article.

**B(a)**

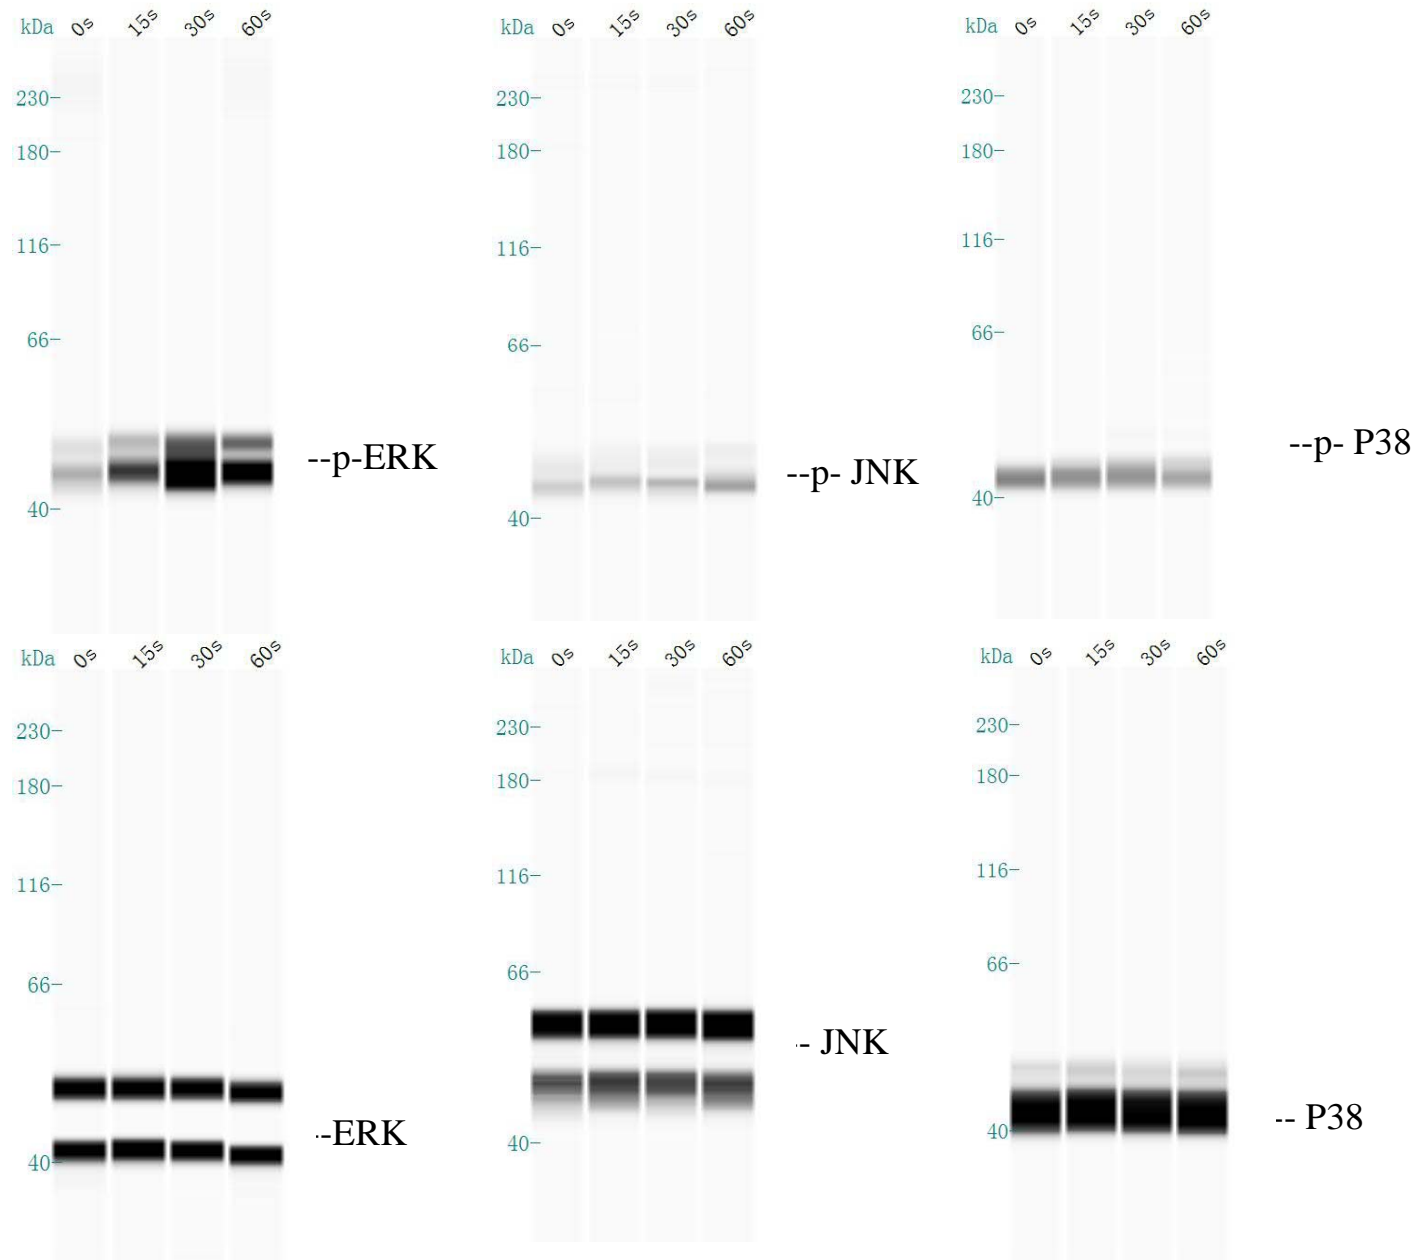

Figure S2 B(a). original non-edited western blotting bands performed by Protein Simple Western of Figure 3A in this article.

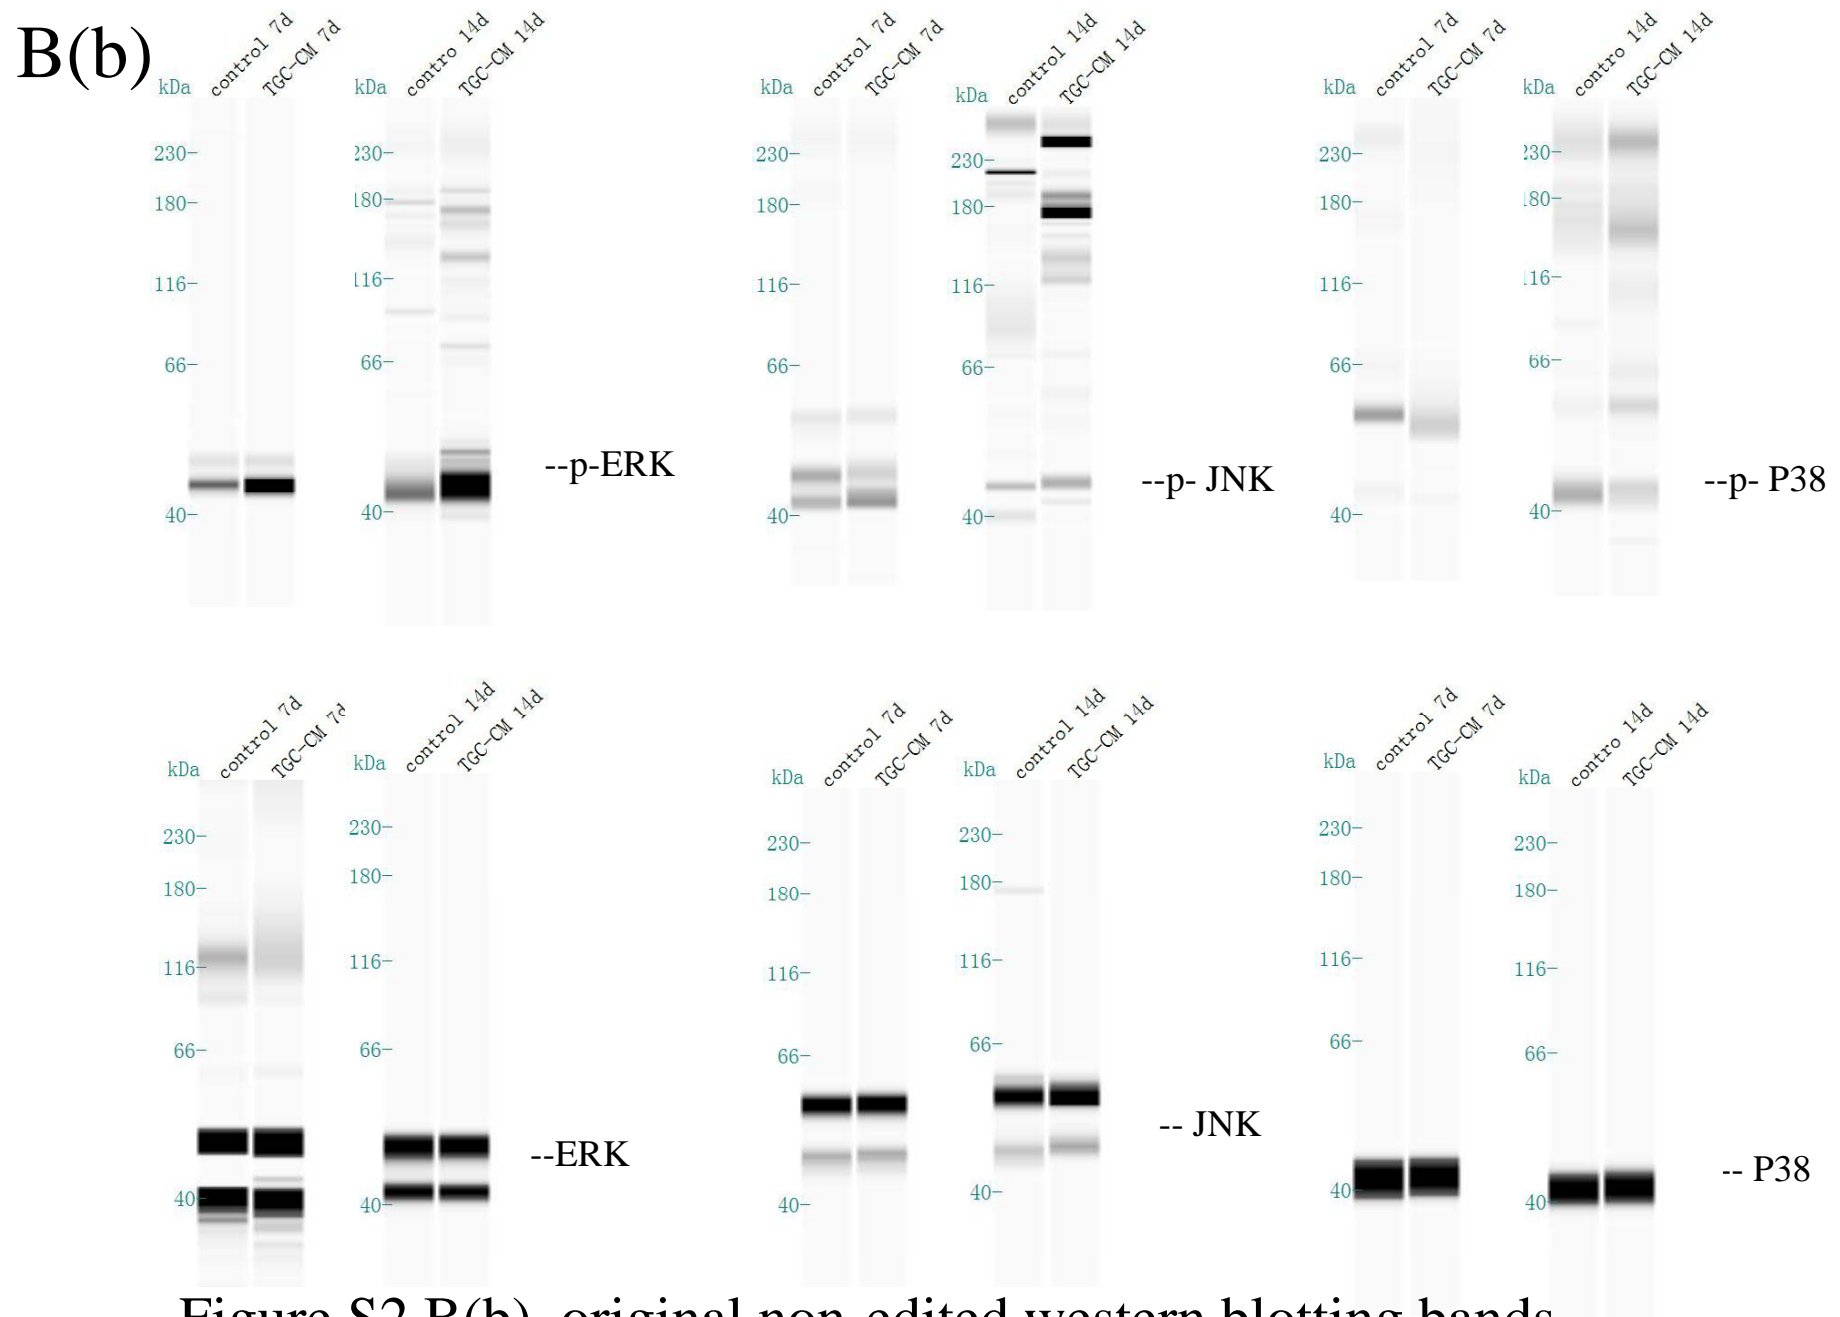

Figure S2 B(b). original non-edited western blotting bands performed by Protein Simple Western of Figure 3B in this article.

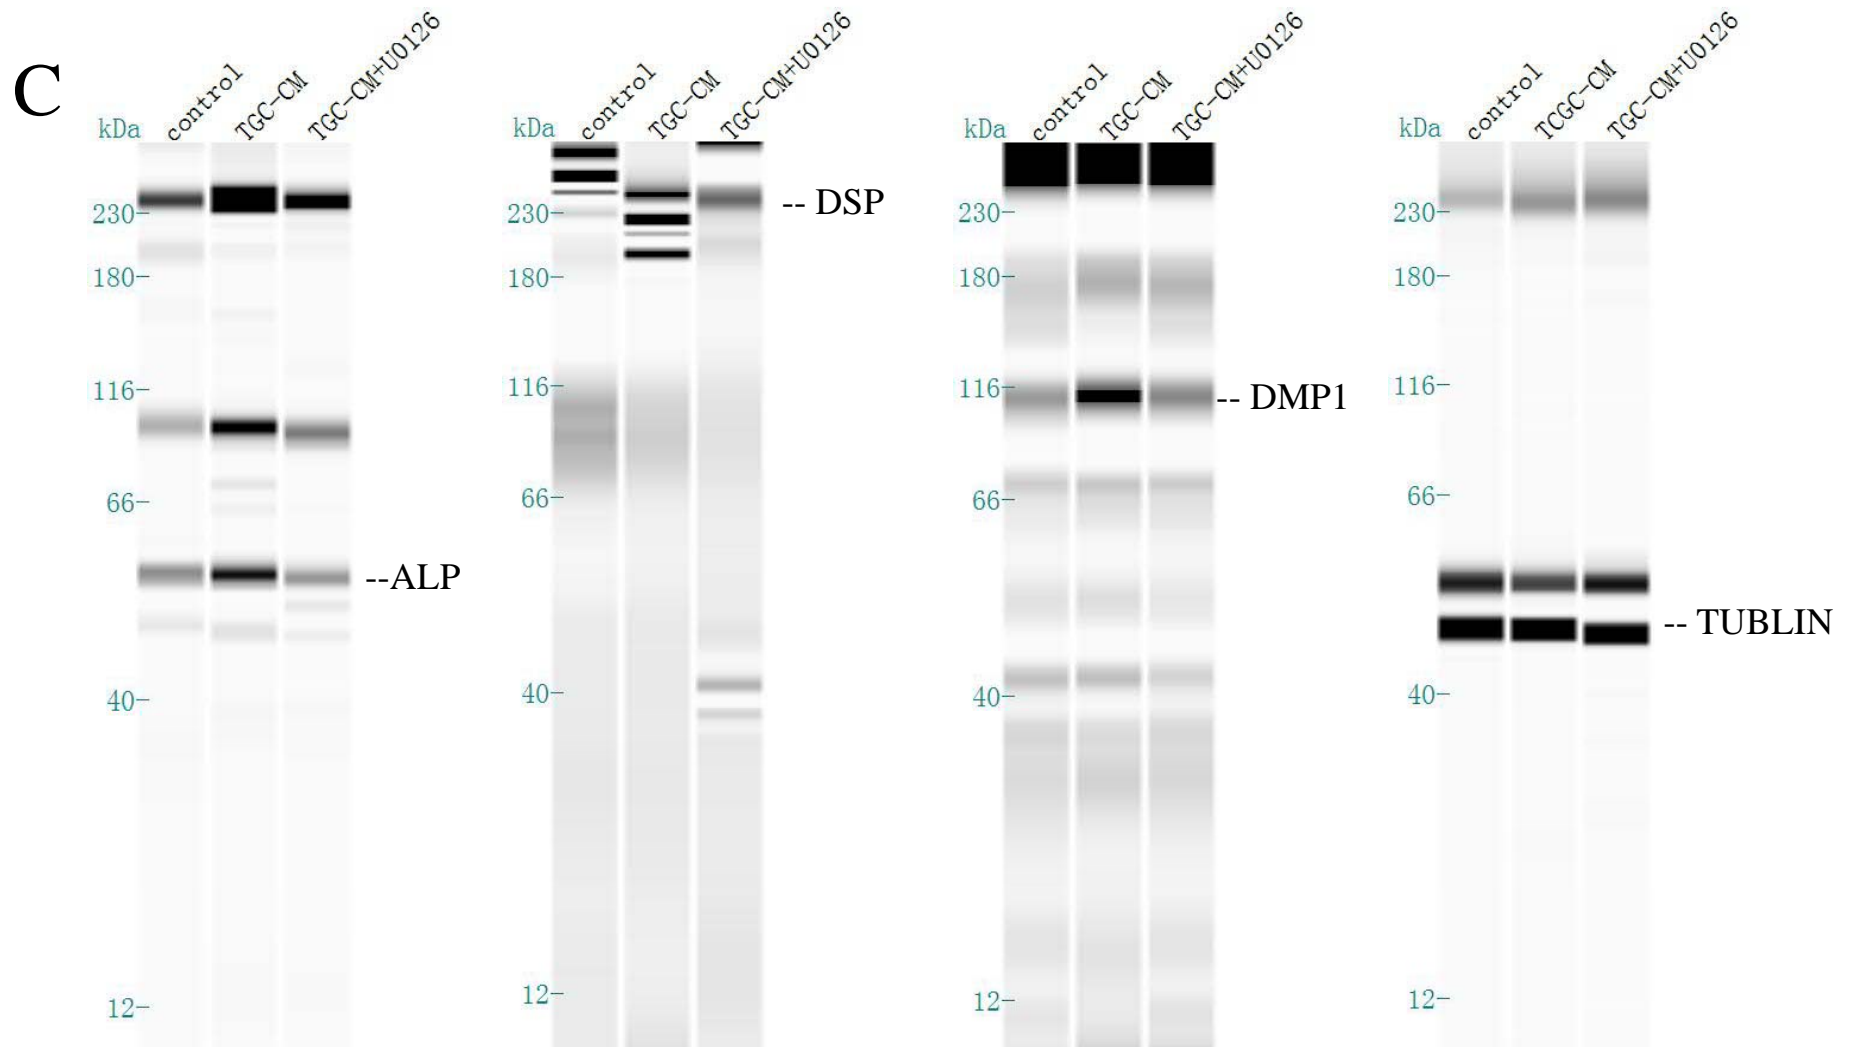

Figure S2 C. original non-edited western blotting bands performed by Protein Simple Western of Figure 4 in this article.

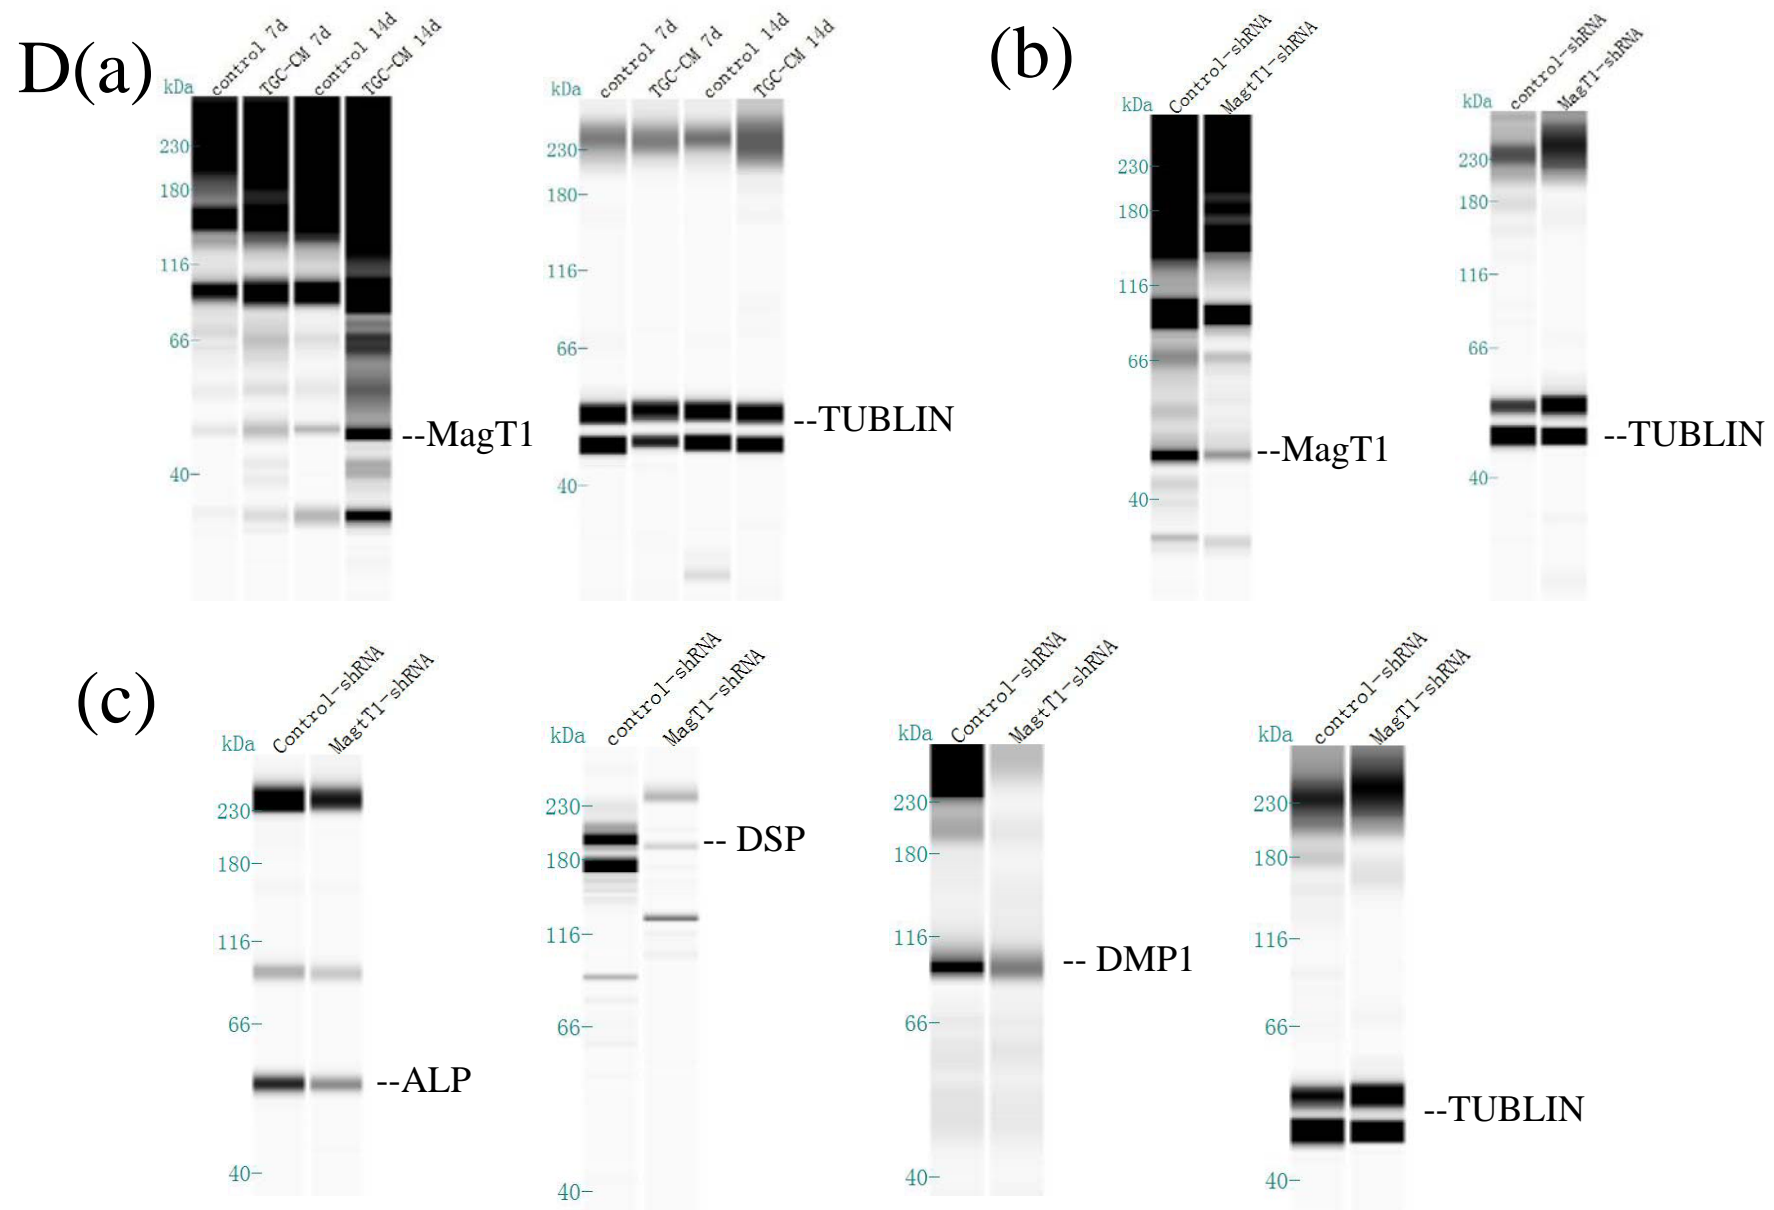

Figure S2 D(a, b, c). original non-edited western blotting bands performed by Protein Simple Western of Figure 5B/C/E in this article.

E

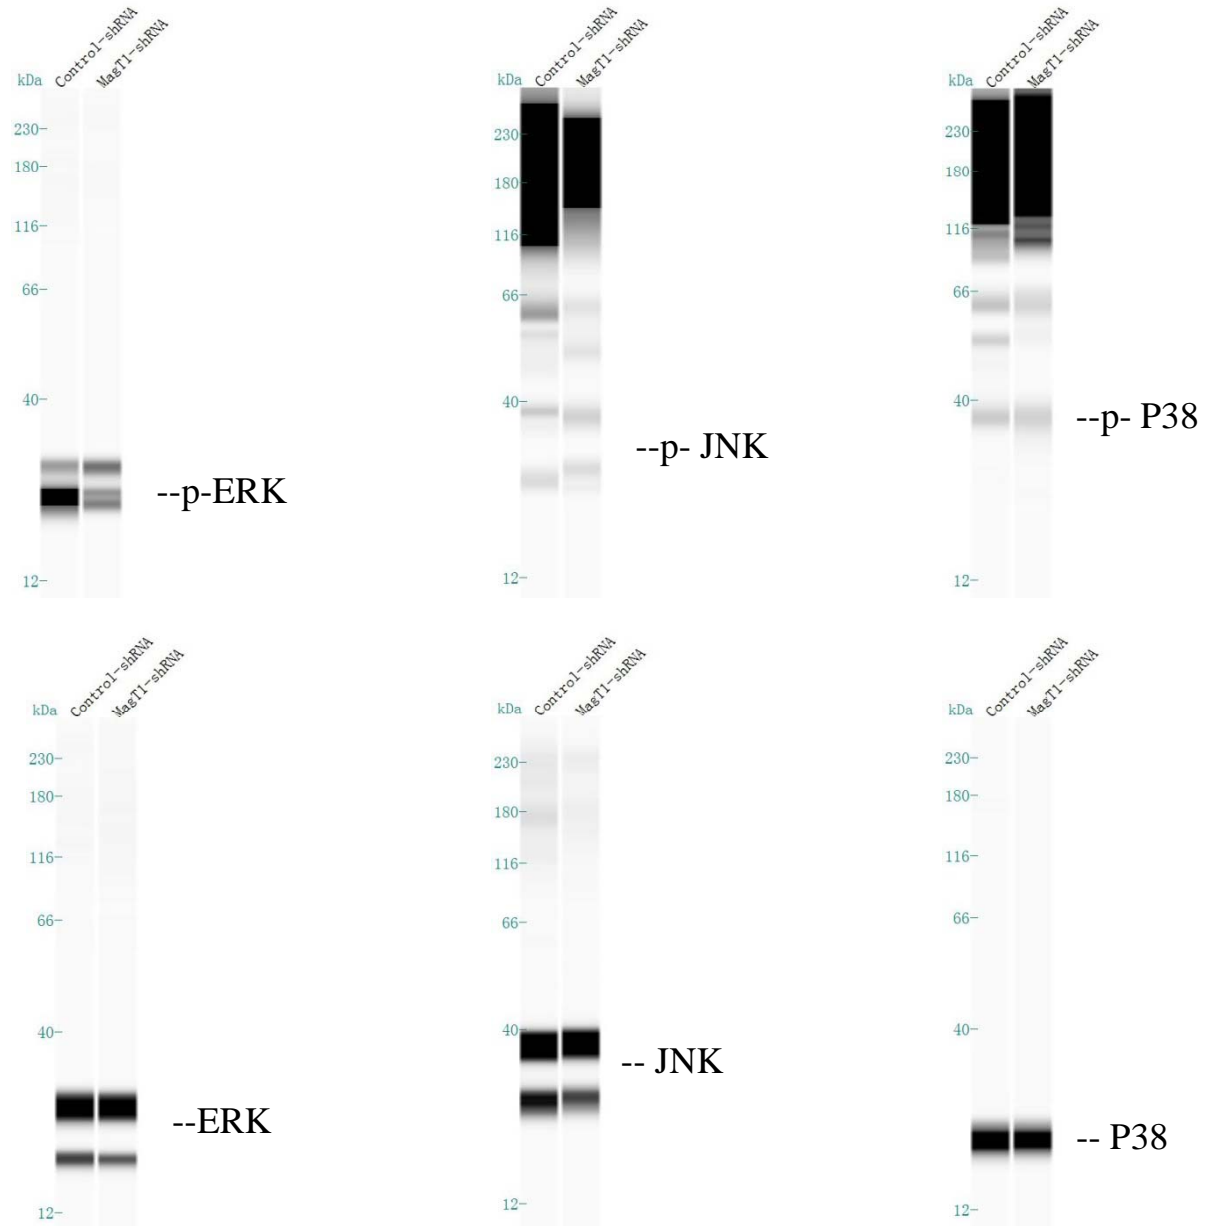

Figure S2 E. original non-edited western blotting bands performed by Protein Simple Western of Figure 7D in this article.
